# Supplementary material for: Phosphoenolpyruvate Cycling via Mitochondrial Phosphoenolpyruvate Carboxykinase Links Anaplerosis and Mitochondrial GTP with Insulin Secretion
Source: PubMed Central journal article supplement — J Biol Chem. 2009 Jul 27;284(39):26578–90. doi: 10.1074/jbc.M109.011775 (PMC2785346; doi:10.1074/jbc.m109.011775), 2009-07-27
Supplement: supp_M109.011775_jbc.M109.011775-1.pdf [file supp_M109.011775_jbc.M109.011775-1.pdf]

## SUPPLEMENTAL FIGURE LEGENDS:

### **Supplemental Figure 1. Natural abundance measurement of aspartate, malate, PEP, and phosphoglycerates.**

Parallel incubations of cells with unlabeled pyruvate were performed as described and shown in Fig. 3. **(A)** Natural abundance of 4 carbons compounds: malate and aspartate. Expected natural abundance indicated by the horizontal bar is 4.4%. **(B)** Natural abundance of 3 carbons compounds: PEP and phosphoglycerates (2-PG and 3-PG). Expected natural abundance indicated by the horizontal bar is 3.3%. (Error bars are S.E.M. and significance by ANOVA within each analyte; \*\*\* P <0.001)

### **Supplemental Figure 2. Percent M+1 isotopologues concentrations of aspartate, malate, PEP, and phosphoglycerates.**

The % M+1 of aspartate, malate, PEP, and phosphoglycerates (2-PG/3-PG) from the experiment in Fig. 3. For comparison the % M+1 rather than APE were shown because of differences in natural abundance enrichments as shown in Fig. S1. **(A)** % M+1 malate compared to aspartate at different glucose concentrations. **(B)** % M+1 for PEP compared to 2PG/3PG at different glucose concentrations. (Error bars are S.E.M. and significance by t-test; \*\*\* P <0.001)

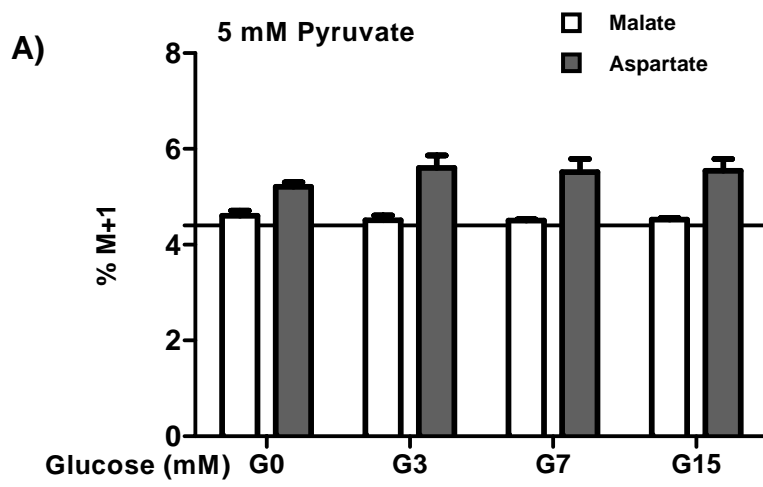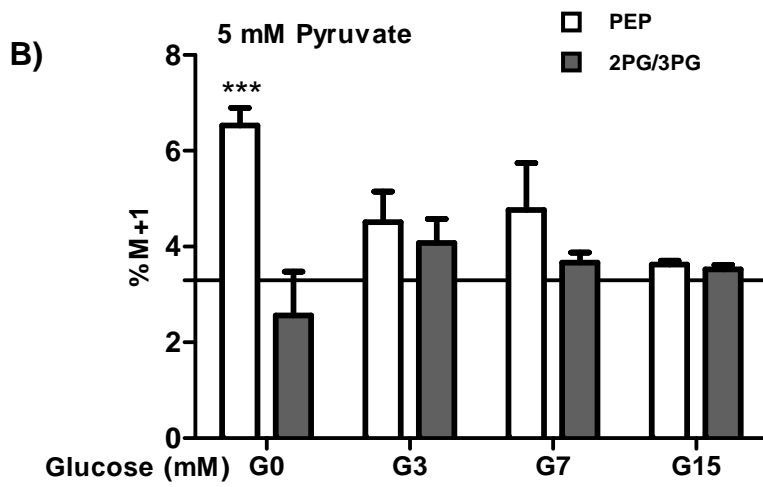

Supplemental Figure 1

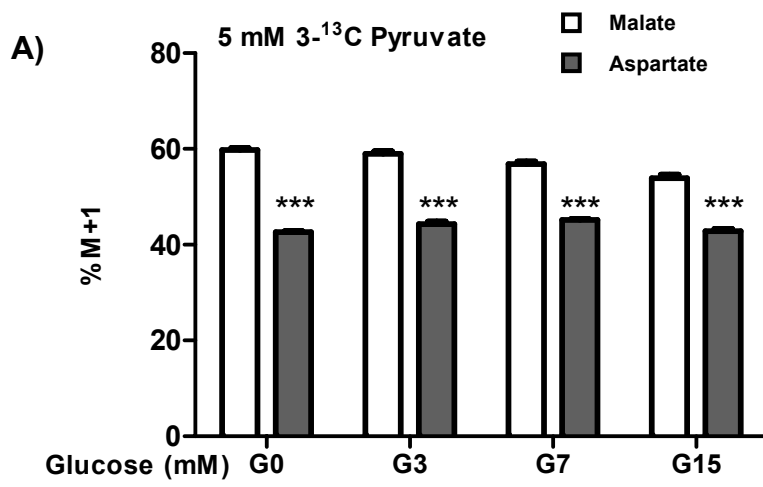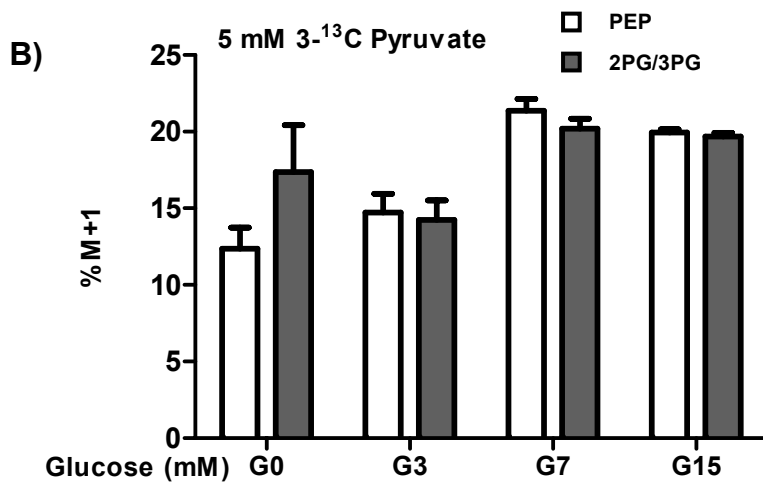

Supplemental Figure 2
